# Supplementary material for: Norharmane rhenium(i) polypyridyl complexes: synthesis, structural and spectroscopic characterization
Source: Royal Society of Chemistry journal article supplement (doi:10.1039/c5dt02790j), 2015-01-01
Supplement: c5dt02790j1.pdf [file c5dt02790j1.pdf]

## Supplementary Material for Dalton Transactions

### Norharmine Rhenium(I) polypyridyl complexes: Synthesis, structural and spectroscopic characterization

Iván Maisuls,<sup>a,b</sup> Ezequiel Wolcan,<sup>a</sup> Oscar E. Piro,<sup>c</sup> Gustavo A. Etcheverría,<sup>c</sup> Gabriela Petroselli,<sup>d</sup> Rosa Erra-Ballsels,<sup>d</sup> Franco M. Cabrerizo,<sup>\*b</sup> and Gustavo T. Ruiz.<sup>\*a</sup>

<sup>a</sup> INIFTA, UNLP (CCT La Plata-CONICET), Diag. 113 y 64, C.C. 16, Suc. 4, (B1906ZAA), La Plata, Argentina. E-mail: gruiz@inifta.unlp.edu.ar

<sup>b</sup> IIB-INTECH – UNSAM-CONICET I. Marino Km 8,2. CC 164, (7130) Chascomús, Buenos Aires, Argentina. E-mail: fcabrerizo@intech.gov.ar

<sup>c</sup> Instituto IFLP (CCT La Plata-CONICET) y Depto. de Física, FCE-UNLP, C. C. 67, (1900) La Plata, Argentina.

<sup>d</sup> CIHIDECAR-CONICET, Departamento de Química Orgánica, FCEyN, UBA, Pabellón II, 3er P., Ciudad Universitaria, (1428) Buenos Aires, Argentina.

### List of Contents

**Fig S1:** mass spectra (ESI, LDI and MALDI) of the complex  $[\text{Re}(\text{CO})_3(\text{bpy})(\text{nHo})]\text{CF}_3\text{SO}_3$ .

**Fig S2:** mass spectra (ESI, LDI and MALDI) of the complex  $[\text{Re}(\text{CO})_3(\text{phen})(\text{nHo})]\text{CF}_3\text{SO}_3$ .

**Table S1:** <sup>1</sup>H RMN data of  $[\text{Re}(\text{CO})_3(\text{bpy})(\text{nHo})]\text{CF}_3\text{SO}_3$  and free nHo.

**Table S2a and S2b:** the most representative ions observed with the different ionization methods used in this work.

**Table S3:** TD-DFT Results of  $[\text{Re}(\text{CO})_3(\text{bpy})(\text{nHo})]\text{CF}_3\text{SO}_3$ .

**Table S4:** percent composition vs. Energy plot and the calculated percent compositions of all fragments at each MO for Re-1.

**Table S5:** percent composition vs. Energy plot and the calculated percent compositions of all fragments at each MO for Re-2.

**Tables S6a and S6b:** fractional coordinates and equivalent isotropic displacement parameters of the non-H atoms.

**Tables S7a and S7b:** full intra-molecular bond distances and angles.

**Tables S8a and S8b:** atomic anisotropic displacement parameters.

**Tables S9a and S9b:** hydrogen atoms positions.

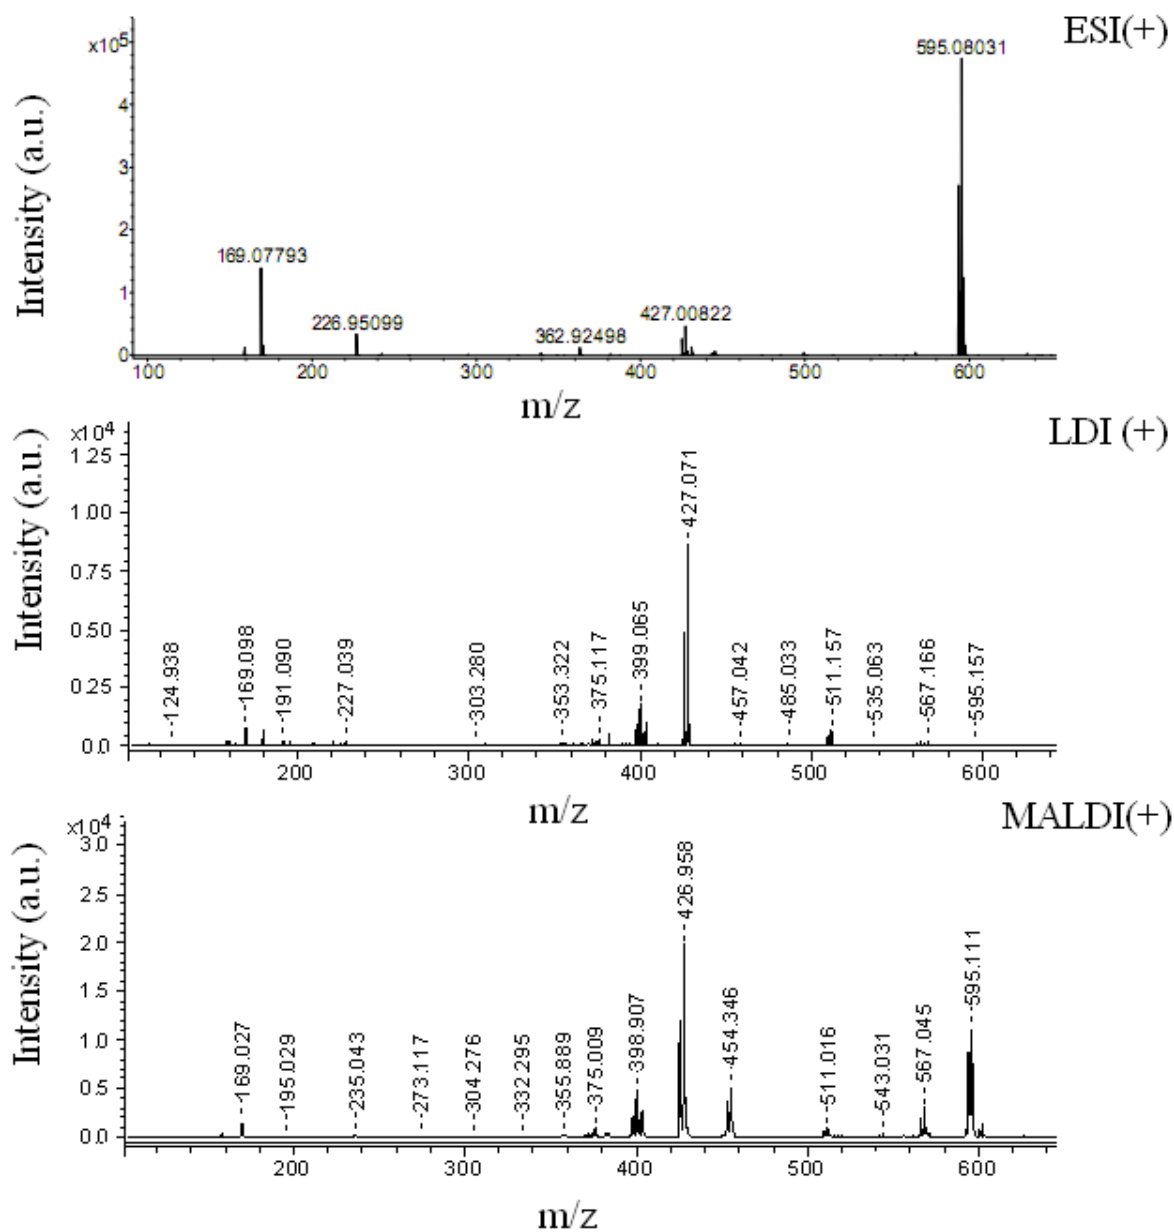

**Fig. S1** Positive ion mass spectra of complex  $[\text{Re}(\text{CO})_3(\text{bpy})(\text{nHo})]^+ [\text{CF}_3\text{SO}_3]^-$  MW = 743.68 detected as  $[\text{M}]^+$ , exact mass = 595.078. a) ESI mass spectrum. b) LDI mass spectrum. c) MALDI mass spectrum acquired with DCTB as MALDI matrix.

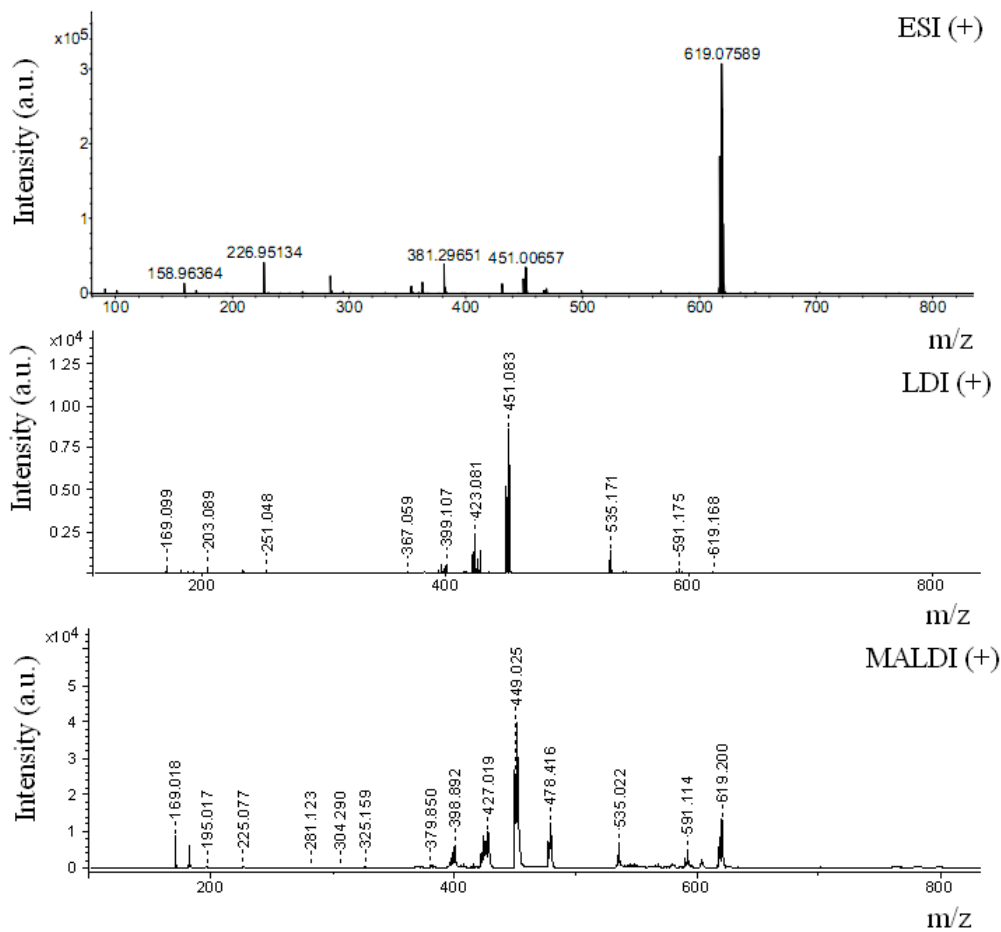

**Fig. S2:** Positive ion mass spectra of complex  $[\text{Re}(\text{CO})_3(\text{phen})(\text{nHo})]^+ [\text{CF}_3\text{SO}_3]^-$  MW = 767.71 detected as  $[\text{M}]^+$ , exact mass = 619.078. a) ESI mass spectrum. b) LDI mass spectrum. c) MALDI mass spectrum acquired with DCTB as MALDI matrix.

**Table S1:**  $^1\text{H-NMR}$  signals (ppm) and coupling constant  $J$  (Hz) for nHo and  $[\text{Re}(\text{CO})_3(\text{bpy})(\text{nHo})]\text{CF}_3\text{SO}_3$ .

|                                                                          | $^1\text{H-NMR}$ |                     |                     |                    |                     |                     |                     |               |                  |                   |                   |                   |                  |                   |                   |                   |    |
|--------------------------------------------------------------------------|------------------|---------------------|---------------------|--------------------|---------------------|---------------------|---------------------|---------------|------------------|-------------------|-------------------|-------------------|------------------|-------------------|-------------------|-------------------|----|
|                                                                          | H-C1             | H-C3                | H-C4                | H-C5               | H-C6                | H-C7                | H-C8                | H-C9          | H-C3''           | H-C4''            | H-C5''            | H-C6''            | H-C3'''          | H-C4'''           | H-C5'''           | H-C6'''           |    |
| nHo                                                                      | 8,920<br>(s)     | 8,347<br>(d, J 5,2) | 8,106<br>(d, J 5,2) | 8,249<br>(d J 7,8) | 7,248<br>(t, J 7,5) | 7,549<br>(t, J 7,5) | 7,607<br>(d, J 8,1) | 11,620<br>(s) | --               | --                | --                | --                | --               | --                | --                | --                | -- |
| $[\text{Re}(\text{CO})_3(\text{bpy})(\text{nHo})]\text{CF}_3\text{SO}_3$ | 8,540<br>(s)     | 8,420<br>(d, J 5,5) | 8,142<br>(d, J 6)   | 8,249<br>(d J 7,5) | 7,270<br>(t, J 7,5) | 7,559<br>(t, J 7,5) | 7,614<br>(d, J 7)   | 11,730<br>(s) | 9,442<br>(d 5,5) | 7,965<br>(t, J 7) | 7,289<br>(t, J 7) | 8,681<br>(d, J 8) | 9,442<br>(d 5,5) | 7,615<br>(t, J 7) | 7,289<br>(t, J 7) | 8,681<br>(d, J 8) |    |

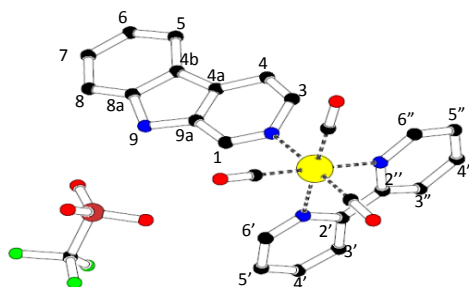

**Table S2a.** Results obtained by mass spectrometry using different ionization methods for the analysis of  $[\text{Re}(\text{CO})_3(\text{bpy})(\text{nHo})]^+[\text{CF}_3\text{SO}_3]^-$  in positive ion mode (n.d. not detected). MALDI matrix: DCTB and nHo.

| Ion formula                                          | Exact mass | ESI  | LDI | MALDI |     |
|------------------------------------------------------|------------|------|-----|-------|-----|
|                                                      |            |      |     | DCTB  | nHo |
| $[\text{Re}(\text{CO})_3(\text{bpy})(\text{nHo})]^+$ | 595.078    |      |     |       | •   |
| $[\text{Re}(\text{CO})_2(\text{bpy})(\text{nHo})]^+$ | 567.083    | ✓    | ✓   | ✓     | ✓   |
| $[\text{Re}(\text{bpy})(\text{nHo})]^+$              | 511.093    | n.d. | ✓   | ✓     | ✓   |
| $[\text{Re}(\text{CO})_3(\text{bpy})]^+$             | 427.009    | ✓    | ✓   | ✓     | ✓   |
| $[\text{Re}(\text{CO})_2(\text{bpy})]^+$             | 399.014    | n.d. | ✓   | ✓     | ✓   |
| $[\text{nHo} + \text{H}]^+$                          | 169.068    | ✓    | ✓   | ✓     | ✓   |

**Table S2b.** Results obtained by mass spectrometry using different ionization methods for the analysis of  $[\text{Re}(\text{CO})_3(\text{phen})(\text{nHo})]^+[\text{CF}_3\text{SO}_3]^-$  in positive ion mode (n.d. not detected). MALDI matrix: DCTB and nHo.

| Ion formula                                           | Exact mass | ESI  | LDI | MALDI |     |
|-------------------------------------------------------|------------|------|-----|-------|-----|
|                                                       |            |      |     | DCTB  | nHo |
| $[\text{Re}(\text{CO})_3(\text{phen})(\text{nHo})]^+$ | 619.078    | ✓    | ✓   | ✓     | ✓   |
| $[\text{Re}(\text{CO})_2(\text{phen})(\text{nHo})]^+$ | 591.083    | n.d. | ✓   | ✓     | ✓   |
| $[\text{Re}(\text{phen})(\text{nHo})]^+$              | 533.093    | n.d. | ✓   | ✓     | ✓   |
| $[\text{Re}(\text{CO})_3(\text{phen})]^+$             | 451.009    | ✓    | ✓   | ✓     | ✓   |
| $[\text{Re}(\text{CO})_2(\text{phen})]^+$             | 432.014    | n.d. | ✓   | ✓     | ✓   |
| $[\text{Re}(\text{phen})]^+$                          | 367.024    | n.d. | ✓   | n.d.  | ✓   |
| $[\text{nHo} + \text{H}]^+$                           | 169.068    | n.d. | ✓   | ✓     | ✓   |

**Table S3:** Comparison of experimental absorption data of the [Re(CO)<sub>3</sub>(bpy)(nHo)]CF<sub>3</sub>SO<sub>3</sub> complex in MeOH with TD-DFT calculations for **Re-1 conformer (a)** and **Re-2 conformer (b)**. Electronic transitions are computed at the PBE0-CPM/LanL2TZ(f)/6-311G/6-311G\* level of theory.

(a)

| $\lambda_{\text{exp}} / \text{nm}$ ( $\epsilon / 10^3$ $\text{M}^{-1}\text{cm}^{-1}$ ) | $\lambda_{\text{calc}} / \text{nm}$ | $f_{\text{osc}}$ | Major contributions                                                     |
|----------------------------------------------------------------------------------------|-------------------------------------|------------------|-------------------------------------------------------------------------|
| 370 (6,8)                                                                              | 391.4                               | 0.0668           | H-1→L (95%)                                                             |
| 307 (30,5)                                                                             | 308.4                               | 0.2909           | H-1→L+1 (76%)                                                           |
|                                                                                        | 300.3                               | 0.0928           | H-5→L (45%), H-2→L+1 (10%), H-2→L+2 (16%), H-1→L+3 (13%)                |
|                                                                                        | 293.0                               | 0.1214           | H-2→L+4 (37%), H-1→L+2 (24%), H→L+4 (17%)                               |
|                                                                                        | 285.6                               | 0.0818           | H-5→L (12%), H-3→L+1 (25%), H-3→L+4 (10%), H-2→L+5 (16%), H-1→L+3 (11%) |
|                                                                                        | 280.9                               | 0.0811           | H-2→L+3 (82%)                                                           |
|                                                                                        | 276.9                               | 0.1296           | H-5→L (12%), H-2→L+2 (31%), H-2→L+5 (25%)                               |
| 249 (43,0)                                                                             | 254.6                               | 0.0645           | H-4→L+3 (60%), H-3→L+3 (21%)                                            |
|                                                                                        | 250.5                               | 0.1952           | H-6→L+1 (31%), H-1→L+6 (13%), H→L+6 (16%)                               |
|                                                                                        | 248.3                               | 0.3116           | H-4→L+4 (29%), H-3→L+4 (12%), H-1→L+4 (12%), H→L+6 (35%)                |
|                                                                                        | 246.4                               | 0.158            | H-6→L+1 (36%), H→L+6 (21%)                                              |
| 241 (41.8)                                                                             | 239.9                               | 0.0647           | H-8→L (17%), H-5→L+2 (68%)                                              |
|                                                                                        | 238.3                               | 0.2402           | H→L+7 (82%)                                                             |
| 230 (31,6)                                                                             | 226.1                               | 0.0631           | H-4→L+12 (10%), H-3→L+6 (15%), H-2→L+10 (10%)                           |

(b)

| $\lambda_{\text{exp}} / \text{nm}$ ( $\epsilon / 10^3$ $\text{M}^{-1}\text{cm}^{-1}$ ) | $\lambda_{\text{calc}} / \text{nm}$ | $f_{\text{osc}}$ | Major contributions                                                     |
|----------------------------------------------------------------------------------------|-------------------------------------|------------------|-------------------------------------------------------------------------|
| 370 (6.8)                                                                              | 361.4                               | 0.074            | H-4→L (59%), H-2→L (39%)                                                |
| 355 (30.5)                                                                             | 345.4                               | 0.0662           | H→L+1 (94%)                                                             |
| 319 (22.2)                                                                             | 317.9                               | 0.3334           | H-1→L+1 (79%)                                                           |
| 307 (30,5)                                                                             | 296.6                               | 0.0627           | H-5→L (10%), H-1→L+3 (24%), H-1→L+4 (20%), H→L+4 (10%)                  |
|                                                                                        | 296.3                               | 0.1382           | H-5→L (41%), H-4→L+1 (12%), H-1→L+5 (11%)                               |
|                                                                                        | 292.0                               | 0.0716           | H-5→L (16%), H-4→L+1 (28%), H-2→L+3 (11%), H-1→L+2 (21%), H-1→L+5 (13%) |
|                                                                                        | 268.9                               | 0.0961           | H-4→L+3 (46%), H-2→L+3 (30%)                                            |
| 262 (35.0)                                                                             | 256.4                               | 0.098            | H-4→L+4 (38%), H-3→L+3 (10%), H-2→L+6 (10%)                             |
|                                                                                        | 253.0                               | 0.3759           | H-6→L+1 (18%), H-3→L+4 (14%), H→L+6 (37%)                               |
| 249 (43.0)                                                                             | 247.8                               | 0.1487           | H-6→L+1 (46%), H→L+6 (27%)                                              |
|                                                                                        | 243.9                               | 0.0512           | H-3→L+4 (41%)                                                           |
| 241 (41.8)                                                                             | 241.5                               | 0.0756           | H-7→L (13%), H-5→L+2 (70%)                                              |
|                                                                                        | 236.8                               | 0.3699           | H-1→L+6 (12%), H→L+7 (62%)                                              |
|                                                                                        | 235.9                               | 0.0559           | H-3→L+5 (10%), H-2→L+5 (10%), H-1→L+6 (31%), H→L+7 (14%)                |
| 230 (31.5)                                                                             | 230.4                               | 0.0928           | H-2→L+9 (19%), H-1→L+7 (24%), H→L+10 (11%)                              |

The experimental spectrum was compared with the calculated spectra obtained by summing Gaussian functions centered at each calculated wavelength with the maxima related to the value of the oscillator strengths (which are also plotted) using eq. 1.

$$\epsilon(\tilde{\nu}) = \frac{2.175 \times 10^8 \text{ L mol}^{-1} \text{ cm}^{-2}}{\Delta_{1/2} \tilde{\nu}} (f_{\text{osc}}) \exp \left[ -2.772 \left( \frac{\tilde{\nu} - \tilde{\nu}_{i \rightarrow f}}{\Delta_{1/2} \tilde{\nu}} \right)^2 \right]$$

This is the formula that GaussSum uses to convolute spectra (see N. O'Boyle, *GaussSum* 2.2.5 program documentation).

In this equation, the parametrical value of the fwhm of the band is given in units of  $\text{cm}^{-1}$  and is symbolized by  $\Delta_{1/2} \tilde{\nu}$ ,  $f_{\text{osc}}$  is the oscillator strength and  $\tilde{\nu}_{i \rightarrow f}$  is the frequency (in units of  $\text{cm}^{-1}$ ) corresponding to the wavelength of the calculated electronic transition.

**Table S4:** HOMOs-LUMOs compositions of **Re-1** along with % composition vs. Energy plots (below)

| MO (energy/eV) | Re    | bpy   | 3 CO  | nHo   |
|----------------|-------|-------|-------|-------|
| H-8 (-9.15)    | 3.80  | 93.58 | 1.70  | 0.93  |
| H-6 (-7.85)    | 0.32  | 0.33  | 0.27  | 99.08 |
| H-5 (-7.72)    | 0.94  | 98.53 | 0.31  | 0.22  |
| H-4 (-7.30)    | 45.03 | 4.35  | 19.57 | 31.05 |
| H-3 (-7.22)    | 54.33 | 3.04  | 24.12 | 18.51 |
| H-2 (-7.01)    | 62.90 | 8.06  | 27.77 | 1.27  |
| H-1 (-6.77)    | 28.92 | 3.21  | 13.38 | 54.49 |
| H (-6.40)      | 0.35  | 0.20  | 0.12  | 99.32 |
| L (-3.03)      | 2.39  | 92.05 | 4.95  | 0.61  |
| L+1 (-2.22)    | 1.08  | 8.36  | 3.93  | 86.63 |
| L+2 (-2.01)    | 1.00  | 88.05 | 2.88  | 8.07  |
| L+3 (-1.91)    | 0.41  | 94.43 | 3.83  | 1.33  |
| L+4 (-1.66)    | 22.10 | 1.72  | 74.63 | 1.55  |
| L+5 (-1.39)    | 17.40 | 6.06  | 74.45 | 2.09  |
| L+6 (-0.99)    | 1.04  | 3.79  | 28.05 | 67.12 |
| L+7 (-0.77)    | 0.74  | 2.67  | 69.87 | 26.72 |

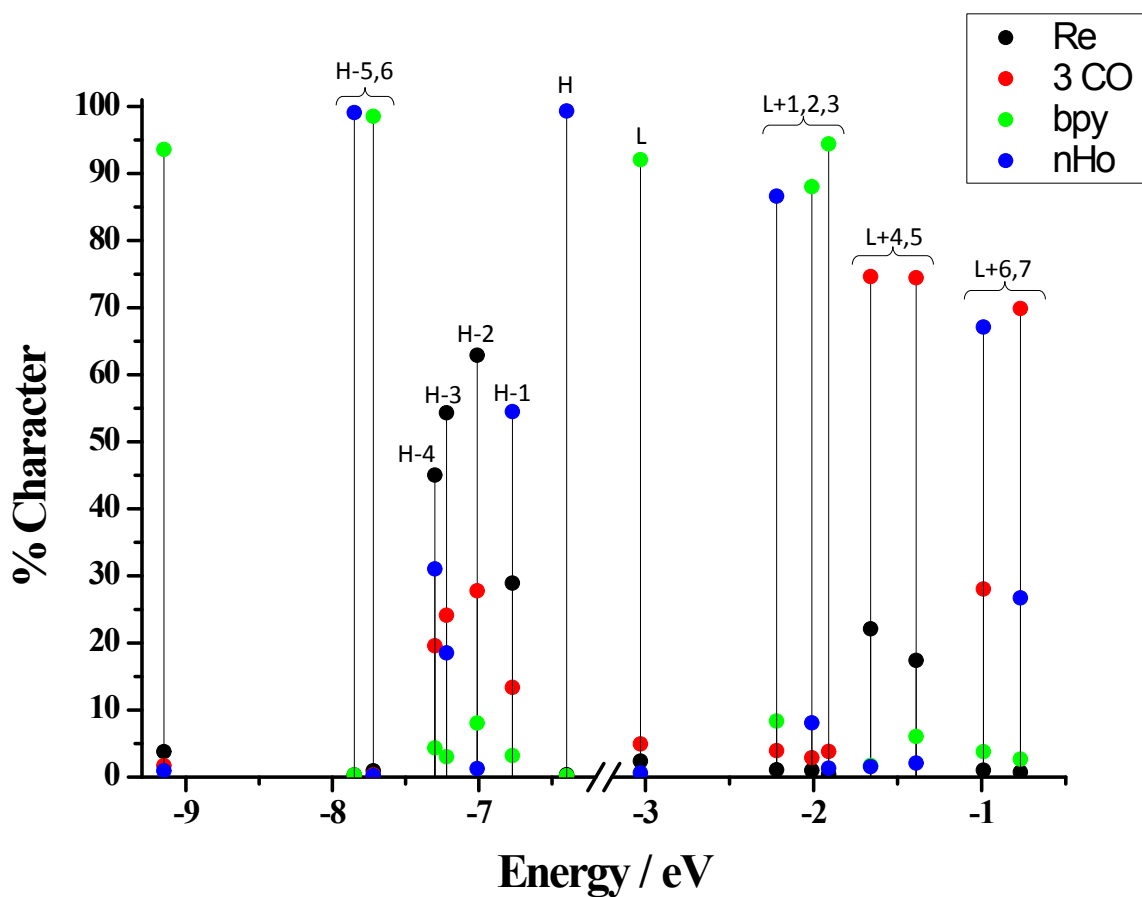

**Table S5:** HOMOs-LUMOs compositions of **Re-2** along with % composition vs. Energy plots (below).

| MO (energy/eV) | Re    | bpy   | 3 CO  | nHo   |
|----------------|-------|-------|-------|-------|
| H-7 (-8.96)    | 0.07  | 27.17 | 0.55  | 72.21 |
| H-6 (-7.84)    | 0.04  | 1.84  | 0.11  | 98.01 |
| H-5 (-7.72)    | 0.74  | 97.20 | 0.27  | 1.79  |
| H-4 (-7.24)    | 67.27 | 2.47  | 30.10 | 0.15  |
| H-3 (-7.22)    | 26.07 | 4.85  | 10.90 | 58.17 |
| H-2 (-7.11)    | 63.00 | 9.47  | 26.81 | 0.72  |
| H-1 (-6.71)    | 33.85 | 2.81  | 16.25 | 47.08 |
| H (-6.39)      | 0.95  | 0.28  | 0.35  | 98.42 |
| L (-3.05)      | 2.17  | 92.4  | 4.81  | 0.62  |
| L+1 (-2.24)    | 2.98  | 0.79  | 8.70  | 87.53 |
| L+2 (-2.02)    | 1.83  | 93.6  | 4.16  | 0.40  |
| L+3 (-1.89)    | 0.50  | 92.55 | 5.77  | 1.18  |
| L+4 (-1.59)    | 17.74 | 3.68  | 66.75 | 11.83 |
| L+5 (-1.38)    | 17.13 | 6.91  | 75.05 | 0.92  |
| L+6 (-0.99)    | 0.22  | 2.37  | 41.71 | 55.70 |
| L+7 (-0.72)    | 0.63  | 0.81  | 57.04 | 41.53 |

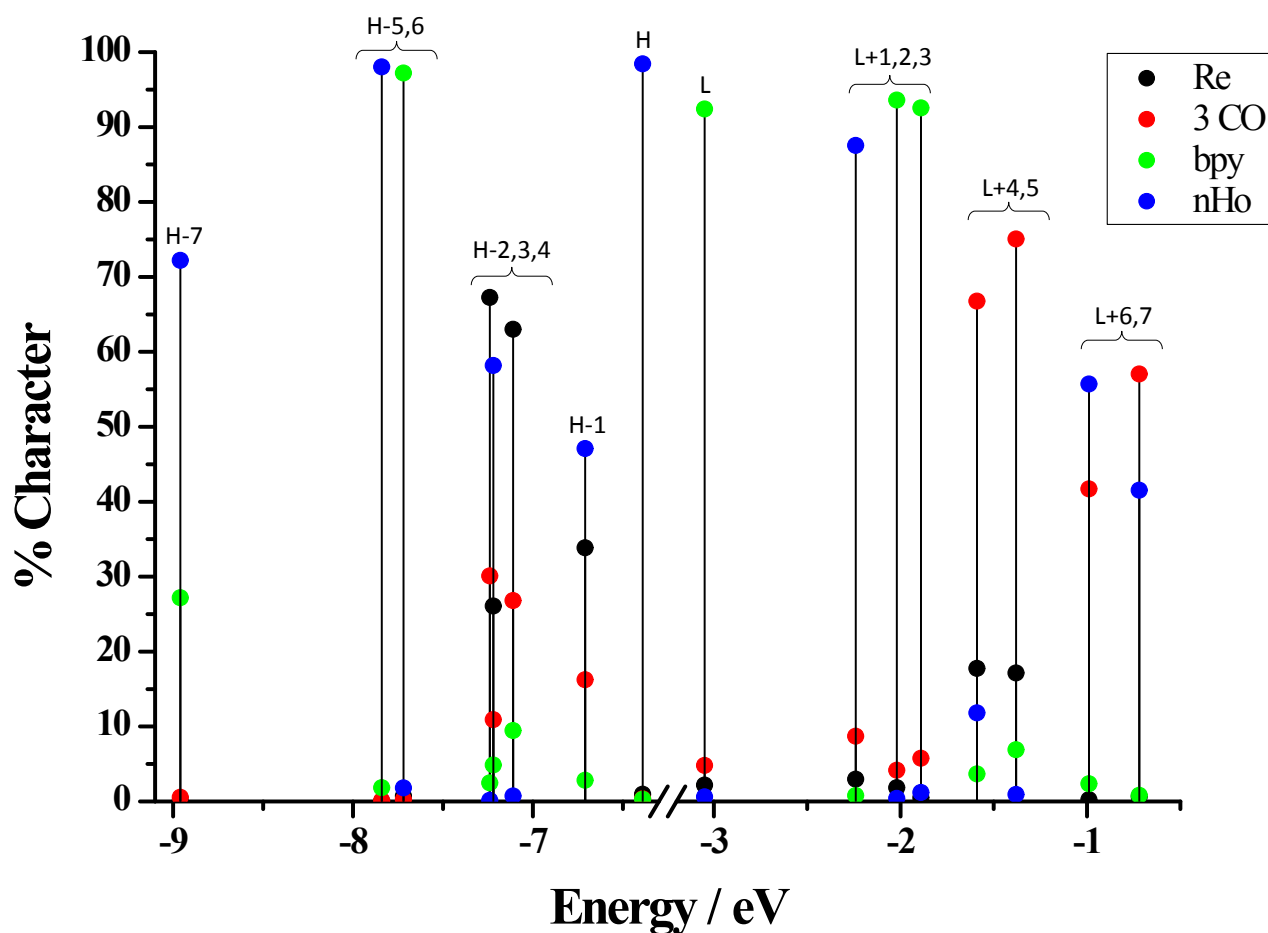

**Table S6a.** Atomic coordinates ( $\times 10^4$ ) and equivalent isotropic displacement parameters ( $\text{\AA}^2 \times 10^3$ ) for *fac*-[Re(CO)<sub>3</sub>(phen)(nHo)]CF<sub>3</sub>SO<sub>3</sub>. U(eq) is defined as one third of the trace of the orthogonalized U<sup>ij</sup> tensor. To be deposited.

| Atom   | x       | y        | z       | U(eq)  |
|--------|---------|----------|---------|--------|
| C(1)   | 4102(5) | 4526(4)  | 2252(3) | 61(1)  |
| C(2)   | 4653(4) | 4006(3)  | 3696(3) | 40(1)  |
| C(3)   | 5688(4) | 3148(3)  | 2599(3) | 44(1)  |
| C(4)   | 7246(3) | 319(3)   | 1397(3) | 46(1)  |
| C(10)  | 577(4)  | 3872(4)  | 3445(3) | 56(1)  |
| C(11)  | 2229(3) | 2349(3)  | 1812(2) | 34(1)  |
| C(12)  | 1607(4) | 1777(3)  | 1262(2) | 37(1)  |
| C(13)  | 2219(4) | 1279(3)  | 733(2)  | 44(1)  |
| C(14)  | 3374(4) | 1383(3)  | 760(2)  | 50(1)  |
| C(15)  | 3933(4) | 1968(3)  | 1320(3) | 47(1)  |
| C(16)  | 1642(3) | 2859(3)  | 2368(2) | 35(1)  |
| C(17)  | 451(4)  | 2818(3)  | 2355(2) | 42(1)  |
| C(18)  | -82(4)  | 3345(3)  | 2914(3) | 54(1)  |
| C(21)  | 4241(4) | 1104(3)  | 3244(3) | 46(1)  |
| C(22)  | 4129(4) | 281(3)   | 3675(3) | 48(1)  |
| C(23)  | 3684(4) | 350(3)   | 4372(2) | 40(1)  |
| C(24)  | 3435(4) | -295(3)  | 4975(3) | 46(1)  |
| C(25)  | 3528(5) | -1289(3) | 5080(3) | 57(1)  |
| C(26)  | 3171(6) | -1686(3) | 5742(4) | 68(2)  |
| C(27)  | 2744(5) | -1113(4) | 6302(3) | 69(2)  |
| C(28)  | 2628(5) | -128(4)  | 6225(3) | 59(1)  |
| C(29)  | 2986(4) | 277(3)   | 5553(3) | 47(1)  |
| C(110) | 1751(4) | 3883(3)  | 3413(2) | 49(1)  |
| C(111) | -153(4) | 2260(3)  | 1778(3) | 47(1)  |
| C(112) | 396(4)  | 1757(3)  | 1260(3) | 47(1)  |
| C(210) | 3385(4) | 1289(3)  | 4614(2) | 39(1)  |
| C(211) | 3523(3) | 2080(3)  | 4162(2) | 40(1)  |
| F(1)   | 8233(3) | 436(2)   | 1825(2) | 72(1)  |
| F(2)   | 7251(3) | -634(2)  | 1193(2) | 75(1)  |
| F(3)   | 6439(3) | 366(2)   | 1921(2) | 75(1)  |
| N(11)  | 3379(3) | 2438(2)  | 1838(2) | 37(1)  |
| N(12)  | 2285(3) | 3393(2)  | 2889(2) | 37(1)  |
| N(21)  | 3942(3) | 1989(2)  | 3468(2) | 38(1)  |
| N(22)  | 2985(3) | 1236(2)  | 5327(2) | 47(1)  |
| O(1)   | 4064(5) | 5267(3)  | 1965(3) | 102(2) |
| O(2)   | 4994(3) | 4390(2)  | 4234(2) | 57(1)  |
| O(3)   | 6636(3) | 3081(3)  | 2490(2) | 65(1)  |
| O(4)   | 7933(3) | 942(2)   | 189(2)  | 56(1)  |
| O(5)   | 7000(3) | 2036(2)  | 998(2)  | 64(1)  |
| O(6)   | 5912(3) | 781(3)   | 316(2)  | 70(1)  |
| Re     | 4112(1) | 3315(1)  | 2786(1) | 38(1)  |
| S(1)   | 6995(1) | 1099(1)  | 647(1)  | 39(1)  |



**Table S6b.** Atomic coordinates ( $\times 10^4$ ) and equivalent isotropic displacement parameters ( $\text{\AA}^2 \times 10^3$ ) for *fac*-[Re(CO)<sub>3</sub>(bpy)(nHo)]CF<sub>3</sub>SO<sub>3</sub>. U(eq) is defined as one third of the trace of the orthogonalized U<sup>ij</sup> tensor. To be deposited.

| Atom   | x         | y         | z        | U(eq)   |
|--------|-----------|-----------|----------|---------|
| C(1)   | 5840(20)  | 3220(20)  | 7354(17) | 86(6)   |
| C(2)   | 4372(14)  | 1574(17)  | 8463(19) | 79(5)   |
| C(3)   | 4434(16)  | 3245(19)  | 8970(20) | 93(6)   |
| C(4)   | 2200(30)  | -2940(30) | 6220(40) | 140(10) |
| C(11)  | 4264(16)  | 3316(17)  | 4535(18) | 81(5)   |
| C(12)  | 4171(19)  | 3890(20)  | 3590(30) | 107(8)  |
| C(13)  | 4170(20)  | 4770(30)  | 3930(30) | 114(8)  |
| C(14)  | 4214(19)  | 5026(19)  | 5190(40) | 112(9)  |
| C(15)  | 4289(15)  | 4430(14)  | 6190(20) | 88(5)   |
| C(16)  | 4263(15)  | 2383(17)  | 4270(20) | 81(5)   |
| C(17)  | 4234(19)  | 1980(20)  | 3030(20) | 108(8)  |
| C(18)  | 4160(20)  | 1020(30)  | 2890(20) | 112(8)  |
| C(19)  | 4150(20)  | 470(20)   | 4030(30) | 108(8)  |
| C(21)  | 2140(14)  | 2227(16)  | 7300(18) | 72(4)   |
| C(22)  | 1106(16)  | 1755(15)  | 7296(18) | 73(4)   |
| C(23)  | 544(14)   | 695(15)   | 7235(16) | 66(4)   |
| C(24)  | -549(17)  | -99(16)   | 7209(16) | 73(5)   |
| C(25)  | -1431(17) | -36(18)   | 7180(20) | 87(6)   |
| C(26)  | -2272(17) | -920(20)  | 7190(30) | 90(7)   |
| C(27)  | -2360(20) | -1930(20) | 7160(20) | 95(7)   |
| C(28)  | -1457(17) | -1950(20) | 7190(20) | 90(6)   |
| C(29)  | -551(13)  | -995(16)  | 7191(15) | 71(4)   |
| C(110) | 4219(15)  | 911(17)   | 5250(20) | 90(5)   |
| C(210) | 1111(13)  | 189(14)   | 7203(15) | 65(4)   |
| C(211) | 2161(14)  | 708(16)   | 7178(17) | 72(4)   |
| N(11)  | 4295(13)  | 3564(13)  | 5853(16) | 84(4)   |
| N(12)  | 4253(11)  | 1805(13)  | 5401(13) | 77(4)   |
| N(21)  | 2674(12)  | 1725(12)  | 7251(14) | 73(4)   |
| N(22)  | 443(12)   | -844(12)  | 7171(15) | 72(4)   |
| O(1)   | 6711(11)  | 3625(14)  | 7410(16) | 103(5)  |
| O(2)   | 4363(13)  | 933(13)   | 9280(15) | 97(4)   |
| O(3)   | 4469(14)  | 3641(15)  | 9976(16) | 111(5)  |
| O(4)   | 2806(18)  | -1142(17) | 6860(30) | 155(9)  |
| O(5)   | 1033(16)  | -2373(16) | 7200(30) | 139(8)  |
| O(6)   | 2350(20)  | -2400(20) | 8650(20) | 169(10) |
| F(1)   | 3087(12)  | -2898(17) | 6350(30) | 177(9)  |
| F(2)   | 1990(30)  | -2780(40) | 5020(40) | 290(20) |
| F(3)   | 1494(19)  | -3937(17) | 6640(50) | 250(20) |
| S(1)   | 2060(5)   | -2113(5)  | 7329(8)  | 107(2)  |
| Re     | 4372(1)   | 2534(1)   | 7340(1)  | 69(1)   |

**Table S7a.** Full intra-molecular lengths [Å] and angles [°] for *fac*-[Re(CO)<sub>3</sub>(phen)(nHo)]CF<sub>3</sub>SO<sub>3</sub>. To be deposited.

|                |          |                     |           |
|----------------|----------|---------------------|-----------|
| C(1)-O(1)      | 1.142(6) | F(1)-C(4)-S(1)      | 116.5(3)  |
| C(1)-Re        | 1.919(6) | F(2)-C(4)-S(1)      | 114.2(3)  |
| C(2)-O(2)      | 1.132(5) | F(3)-C(4)-S(1)      | 113.4(3)  |
| C(2)-Re        | 1.930(4) | C(18)-C(10)-C(110)  | 119.5(4)  |
| C(3)-O(3)      | 1.151(6) | N(11)-C(11)-C(16)   | 117.7(3)  |
| C(3)-Re        | 1.923(5) | N(11)-C(11)-C(12)   | 122.8(4)  |
| C(4)-F(1)      | 1.348(5) | C(16)-C(11)-C(12)   | 119.5(4)  |
| C(4)-F(2)      | 1.365(5) | C(13)-C(12)-C(11)   | 117.6(4)  |
| C(4)-F(3)      | 1.371(5) | C(13)-C(12)-C(112)  | 123.6(4)  |
| C(4)-S(1)      | 1.713(5) | C(11)-C(12)-C(112)  | 118.8(4)  |
| C(10)-C(18)    | 1.377(7) | C(14)-C(13)-C(12)   | 119.1(4)  |
| C(10)-C(110)   | 1.389(6) | C(13)-C(14)-C(15)   | 120.2(4)  |
| C(11)-N(11)    | 1.358(5) | N(11)-C(15)-C(14)   | 122.3(4)  |
| C(11)-C(16)    | 1.423(5) | N(12)-C(16)-C(17)   | 122.6(4)  |
| C(11)-C(12)    | 1.413(5) | N(12)-C(16)-C(11)   | 117.1(4)  |
| C(12)-C(13)    | 1.397(6) | C(17)-C(16)-C(11)   | 120.3(3)  |
| C(12)-C(112)   | 1.427(6) | C(16)-C(17)-C(18)   | 117.6(4)  |
| C(13)-C(14)    | 1.365(6) | C(16)-C(17)-C(111)  | 118.8(4)  |
| C(14)-C(15)    | 1.401(6) | C(18)-C(17)-C(111)  | 123.6(4)  |
| C(15)-N(11)    | 1.328(5) | C(10)-C(18)-C(17)   | 119.3(4)  |
| C(16)-N(12)    | 1.364(5) | N(21)-C(21)-C(22)   | 123.8(4)  |
| C(16)-C(17)    | 1.403(6) | C(23)-C(22)-C(21)   | 119.4(4)  |
| C(17)-C(18)    | 1.407(6) | C(22)-C(23)-C(24)   | 136.9(4)  |
| C(17)-C(111)   | 1.423(6) | C(22)-C(23)-C(210)  | 116.9(4)  |
| C(21)-N(21)    | 1.340(5) | C(24)-C(23)-C(210)  | 106.2(4)  |
| C(21)-C(22)    | 1.379(6) | C(25)-C(24)-C(29)   | 119.1(4)  |
| C(22)-C(23)    | 1.368(6) | C(25)-C(24)-C(23)   | 134.1(4)  |
| C(23)-C(24)    | 1.432(6) | C(29)-C(24)-C(23)   | 106.8(4)  |
| C(23)-C(210)   | 1.419(6) | C(26)-C(25)-C(24)   | 118.7(5)  |
| C(24)-C(25)    | 1.390(6) | C(25)-C(26)-C(27)   | 121.2(5)  |
| C(24)-C(29)    | 1.419(6) | C(26)-C(27)-C(28)   | 122.4(5)  |
| C(25)-C(26)    | 1.379(8) | C(29)-C(28)-C(27)   | 116.4(5)  |
| C(26)-C(27)    | 1.385(8) | N(22)-C(29)-C(28)   | 129.2(4)  |
| C(27)-C(28)    | 1.375(7) | N(22)-C(29)-C(24)   | 108.8(4)  |
| C(28)-C(29)    | 1.399(7) | C(28)-C(29)-C(24)   | 122.1(4)  |
| C(29)-N(22)    | 1.385(5) | N(12)-C(110)-C(10)  | 122.8(4)  |
| C(110)-N(12)   | 1.336(5) | C(112)-C(111)-C(17) | 121.4(4)  |
| C(111)-C(112)  | 1.347(6) | C(111)-C(112)-C(12) | 121.2(4)  |
| C(210)-N(22)   | 1.371(5) | N(22)-C(210)-C(211) | 129.4(4)  |
| C(210)-C(211)  | 1.370(6) | N(22)-C(210)-C(23)  | 109.6(4)  |
| C(211)-N(21)   | 1.354(5) | C(211)-C(210)-C(23) | 121.0(4)  |
| N(11)-Re       | 2.187(3) | N(21)-C(211)-C(210) | 120.9(4)  |
| N(12)-Re       | 2.176(4) | C(15)-N(11)-C(11)   | 118.1(3)  |
| N(21)-Re       | 2.207(3) | C(15)-N(11)-Re      | 127.4(3)  |
| O(4)-S(1)      | 1.429(3) | C(11)-N(11)-Re      | 114.5(2)  |
| O(5)-S(1)      | 1.435(4) | C(110)-N(12)-C(16)  | 118.1(4)  |
| O(6)-S(1)      | 1.433(3) | C(110)-N(12)-Re     | 126.9(3)  |
|                |          | C(16)-N(12)-Re      | 114.9(3)  |
| O(1)-C(1)-Re   | 176.2(5) | C(21)-N(21)-C(211)  | 118.0(4)  |
| O(2)-C(2)-Re   | 178.0(4) | C(21)-N(21)-Re      | 124.4(3)  |
| O(3)-C(3)-Re   | 177.7(4) | C(211)-N(21)-Re     | 117.6(3)  |
| F(1)-C(4)-F(2) | 104.0(4) | C(210)-N(22)-C(29)  | 108.6(4)  |
| F(1)-C(4)-F(3) | 103.5(3) | C(1)-Re-C(3)        | 89.6(2)   |
| F(2)-C(4)-F(3) | 103.8(4) | C(1)-Re-C(2)        | 87.86(19) |

|                |            |                |           |
|----------------|------------|----------------|-----------|
| C(3)-Re-C(2)   | 86.30(17)  | C(2)-Re-N(21)  | 90.01(15) |
| C(1)-Re-N(12)  | 91.5(2)    | N(12)-Re-N(21) | 82.39(12) |
| C(3)-Re-N(12)  | 173.48(14) | N(11)-Re-N(21) | 84.59(12) |
| C(2)-Re-N(12)  | 100.17(15) | O(4)-S(1)-O(5) | 113.6(2)  |
| C(1)-Re-N(11)  | 97.09(17)  | O(4)-S(1)-O(6) | 115.3(2)  |
| C(3)-Re-N(11)  | 97.82(15)  | O(5)-S(1)-O(6) | 115.3(2)  |
| C(2)-Re-N(11)  | 173.55(15) | O(4)-S(1)-C(4) | 103.8(2)  |
| N(12)-Re-N(11) | 75.66(12)  | O(5)-S(1)-C(4) | 104.1(2)  |
| C(1)-Re-N(21)  | 173.11(19) | O(6)-S(1)-C(4) | 102.6(2)  |
| C(3)-Re-N(21)  | 96.83(16)  |                |           |

---

**Table S7b:** Full intra-molecular lengths [Å] and angles [°] for *fac*-[Re(CO)<sub>3</sub>(bpy)(nHo)]CF<sub>3</sub>SO<sub>3</sub>. To be deposited

|                   |           |                     |           |
|-------------------|-----------|---------------------|-----------|
| C(1)-O(1)         | 1.15(3)   | C(12)-C(11)-C(16)   | 124(2)    |
| C(1)-Re           | 1.93(3)   | C(13)-C(12)-C(11)   | 120(3)    |
| C(2)-O(2)         | 1.26(3)   | C(14)-C(13)-C(12)   | 120(3)    |
| C(2)-Re           | 1.84(2)   | C(13)-C(14)-C(15)   | 120(3)    |
| C(3)-O(3)         | 1.16(3)   | N(11)-C(15)-C(14)   | 119(2)    |
| C(3)-Re           | 1.93(3)   | C(17)-C(16)-N(12)   | 117(2)    |
| C(4)-F(2)         | 1.29(5)   | C(17)-C(16)-C(11)   | 126(2)    |
| C(4)-F(1)         | 1.32(4)   | N(12)-C(16)-C(11)   | 117.1(17) |
| C(4)-F(3)         | 1.41(5)   | C(16)-C(17)-C(18)   | 121(2)    |
| C(4)-S(1)         | 1.76(4)   | C(17)-C(18)-C(19)   | 120(2)    |
| C(11)-N(11)       | 1.36(2)   | C(110)-C(19)-C(18)  | 117(3)    |
| C(11)-C(12)       | 1.34(3)   | N(21)-C(21)-C(22)   | 123.9(19) |
| C(11)-C(16)       | 1.44(3)   | C(21)-C(22)-C(23)   | 119.1(17) |
| C(12)-C(13)       | 1.38(4)   | C(22)-C(23)-C(210)  | 116.1(16) |
| C(13)-C(14)       | 1.31(5)   | C(22)-C(23)-C(24)   | 136.7(17) |
| C(14)-C(15)       | 1.39(4)   | C(210)-C(23)-C(24)  | 107.2(16) |
| C(15)-N(11)       | 1.36(3)   | C(29)-C(24)-C(23)   | 104.8(16) |
| C(16)-C(17)       | 1.38(3)   | C(29)-C(24)-C(25)   | 123(2)    |
| C(16)-N(12)       | 1.42(3)   | C(23)-C(24)-C(25)   | 131.9(19) |
| C(17)-C(18)       | 1.41(4)   | C(26)-C(25)-C(24)   | 114(2)    |
| C(18)-C(19)       | 1.40(4)   | C(25)-C(26)-C(27)   | 127(2)    |
| C(19)-C(110)      | 1.37(3)   | C(26)-C(27)-C(28)   | 117(2)    |
| C(21)-N(21)       | 1.36(2)   | C(29)-C(28)-C(27)   | 116(2)    |
| C(21)-C(22)       | 1.36(3)   | C(24)-C(29)-C(28)   | 123(2)    |
| C(22)-C(23)       | 1.39(3)   | C(24)-C(29)-N(22)   | 111.8(18) |
| C(23)-C(210)      | 1.41(3)   | C(28)-C(29)-N(22)   | 125(2)    |
| C(23)-C(24)       | 1.48(3)   | N(12)-C(110)-C(19)  | 123(2)    |
| C(24)-C(29)       | 1.36(3)   | N(22)-C(210)-C(211) | 129.2(17) |
| C(24)-C(25)       | 1.39(3)   | N(22)-C(210)-C(23)  | 108.5(15) |
| C(25)-C(26)       | 1.31(3)   | C(211)-C(210)-C(23) | 122.3(18) |
| C(26)-C(27)       | 1.48(3)   | N(21)-C(211)-C(210) | 119.8(18) |
| C(27)-C(28)       | 1.38(4)   | C(15)-N(11)-C(11)   | 119.4(18) |
| C(28)-C(29)       | 1.42(3)   | C(15)-N(11)-Re      | 123.1(14) |
| C(29)-N(22)       | 1.41(2)   | C(11)-N(11)-Re      | 117.5(14) |
| C(110)-N(12)      | 1.34(3)   | C(110)-N(12)-C(16)  | 121.0(17) |
| C(210)-N(22)      | 1.38(2)   | C(110)-N(12)-Re     | 124.3(14) |
| C(210)-C(211)     | 1.38(2)   | C(16)-N(12)-Re      | 114.6(13) |
| C(211)-N(21)      | 1.34(3)   | C(211)-N(21)-C(21)  | 118.7(16) |
| N(11)-Re          | 2.200(16) | C(211)-N(21)-Re     | 118.8(13) |
| N(12)-Re          | 2.190(15) | C(21)-N(21)-Re      | 122.4(13) |
| N(21)-Re          | 2.233(16) | C(210)-N(22)-C(29)  | 107.7(16) |
| O(4)-S(1)         | 1.41(2)   | O(4)-S(1)-O(5)      | 117.2(15) |
| O(5)-S(1)         | 1.41(2)   | O(4)-S(1)-O(6)      | 113.0(17) |
| O(6)-S(1)         | 1.52(2)   | O(5)-S(1)-O(6)      | 115.8(17) |
|                   |           | O(4)-S(1)-C(4)      | 102.6(18) |
| O(1)-C(1)-Re      | 177.5(17) | O(5)-S(1)-C(4)      | 104.5(17) |
| O(2)-C(2)-Re      | 177.4(16) | O(6)-S(1)-C(4)      | 100.7(18) |
| O(3)-C(3)-Re      | 177(2)    | C(2)-Re-C(1)        | 88.2(8)   |
| F(2)-C(4)-F(1)    | 115(4)    | C(2)-Re-C(3)        | 84.7(9)   |
| F(2)-C(4)-F(3)    | 111(4)    | C(1)-Re-C(3)        | 88.2(9)   |
| F(1)-C(4)-F(3)    | 103(3)    | C(2)-Re-N(12)       | 99.9(7)   |
| F(2)-C(4)-S(1)    | 109(3)    | C(1)-Re-N(12)       | 93.6(7)   |
| F(1)-C(4)-S(1)    | 113(3)    | C(3)-Re-N(12)       | 175.0(8)  |
| F(3)-C(4)-S(1)    | 106(3)    | C(2)-Re-N(11)       | 174.5(7)  |
| N(11)-C(11)-C(12) | 120(2)    | C(1)-Re-N(11)       | 94.3(7)   |
| N(11)-C(11)-C(16) | 115.5(16) | C(3)-Re-N(11)       | 100.2(8)  |

|                |          |                |         |
|----------------|----------|----------------|---------|
| N(12)-Re-N(11) | 75.1(6)  | C(3)-Re-N(21)  | 93.5(7) |
| C(2)-Re-N(21)  | 92.6(7)  | N(12)-Re-N(21) | 84.6(6) |
| C(1)-Re-N(21)  | 178.1(7) | N(11)-Re-N(21) | 84.7(6) |

---

**Table S8a.** Anisotropic displacement parameters ( $\text{\AA}^2 \times 10^3$ ) for *fac*-[Re(CO)<sub>3</sub>(phen)(nHo)]CF<sub>3</sub>SO<sub>3</sub>. The anisotropic displacement factor exponent takes the form:  $-2\pi^2 [h^2 a^{*2} U^{11} + \dots + 2 h k a^* b^* U^{12}]$ . To be deposited.

| Atom   | U11    | U22   | U33   | U23    | U13    | U12    |
|--------|--------|-------|-------|--------|--------|--------|
| C(1)   | 75(4)  | 54(3) | 52(3) | 0(3)   | -9(3)  | -11(3) |
| C(2)   | 36(2)  | 37(2) | 48(2) | -6(2)  | 8(2)   | -3(2)  |
| C(3)   | 48(3)  | 46(3) | 38(2) | -8(2)  | 3(2)   | -10(2) |
| C(4)   | 28(2)  | 63(3) | 49(2) | -23(2) | 10(2)  | -17(2) |
| C(10)  | 45(3)  | 67(3) | 55(3) | -16(3) | 0(2)   | 15(2)  |
| C(11)  | 38(2)  | 28(2) | 37(2) | -1(2)  | -2(2)  | 3(2)   |
| C(12)  | 46(2)  | 30(2) | 35(2) | 1(2)   | -4(2)  | 0(2)   |
| C(13)  | 55(3)  | 36(2) | 38(2) | -7(2)  | -8(2)  | -2(2)  |
| C(14)  | 60(3)  | 51(3) | 39(2) | -16(2) | 2(2)   | 8(2)   |
| C(15)  | 42(3)  | 55(3) | 45(2) | -6(2)  | 5(2)   | 1(2)   |
| C(16)  | 40(2)  | 30(2) | 33(2) | 1(2)   | -4(2)  | 1(2)   |
| C(17)  | 36(2)  | 40(2) | 52(2) | -2(2)  | -1(2)  | 1(2)   |
| C(18)  | 37(2)  | 62(3) | 64(3) | -6(3)  | 5(2)   | 9(2)   |
| C(21)  | 44(3)  | 49(3) | 44(2) | -15(2) | 4(2)   | 7(2)   |
| C(22)  | 54(3)  | 37(2) | 51(3) | -13(2) | 2(2)   | 8(2)   |
| C(23)  | 38(2)  | 35(2) | 47(2) | -9(2)  | -3(2)  | 1(2)   |
| C(24)  | 48(3)  | 36(2) | 51(2) | -6(2)  | -5(2)  | 3(2)   |
| C(25)  | 74(4)  | 36(2) | 60(3) | -10(2) | -7(3)  | 6(2)   |
| C(26)  | 95(5)  | 40(3) | 69(4) | 3(3)   | -11(3) | 0(3)   |
| C(27)  | 84(4)  | 57(3) | 63(3) | 11(3)  | -2(3)  | 0(3)   |
| C(28)  | 68(3)  | 55(3) | 54(3) | 2(3)   | 6(2)   | 2(3)   |
| C(29)  | 46(3)  | 45(2) | 48(2) | -3(2)  | -2(2)  | 6(2)   |
| C(110) | 52(3)  | 48(3) | 45(2) | -15(2) | -6(2)  | 11(2)  |
| C(111) | 34(2)  | 45(3) | 61(3) | -1(2)  | -5(2)  | -1(2)  |
| C(112) | 47(3)  | 40(2) | 52(3) | -3(2)  | -9(2)  | -10(2) |
| C(210) | 38(2)  | 40(2) | 40(2) | -6(2)  | 3(2)   | 3(2)   |
| C(211) | 37(2)  | 36(2) | 47(2) | -9(2)  | 3(2)   | 5(2)   |
| F(1)   | 62(2)  | 88(2) | 62(2) | 22(2)  | -12(1) | -13(2) |
| F(2)   | 100(3) | 44(2) | 83(2) | 11(2)  | 18(2)  | -5(2)  |
| F(3)   | 79(2)  | 90(2) | 58(2) | 4(2)   | 28(2)  | -22(2) |
| N(11)  | 34(2)  | 40(2) | 36(2) | -7(2)  | 3(1)   | -1(2)  |
| N(12)  | 37(2)  | 37(2) | 37(2) | -9(2)  | -3(2)  | 5(1)   |
| N(21)  | 37(2)  | 35(2) | 42(2) | -5(2)  | 4(2)   | 2(2)   |
| N(22)  | 60(2)  | 34(2) | 47(2) | -3(2)  | 12(2)  | 9(2)   |
| O(1)   | 151(5) | 65(3) | 87(3) | 25(2)  | -7(3)  | -16(3) |
| O(2)   | 59(2)  | 66(2) | 45(2) | -20(2) | 3(2)   | -16(2) |
| O(3)   | 41(2)  | 90(3) | 67(2) | -16(2) | 14(2)  | -8(2)  |
| O(4)   | 54(2)  | 65(2) | 51(2) | 10(2)  | 19(2)  | 3(2)   |
| O(5)   | 84(3)  | 41(2) | 68(2) | -2(2)  | 17(2)  | -4(2)  |
| O(6)   | 51(2)  | 89(3) | 68(2) | 1(2)   | -9(2)  | -10(2) |
| Re     | 35(1)  | 40(1) | 37(1) | -8(1)  | -1(1)  | -3(1)  |
| S(1)   | 36(1)  | 39(1) | 42(1) | -4(1)  | 6(1)   | -5(1)  |

**Table S8b.** Anisotropic displacement parameters ( $\text{\AA}^2 \times 10^3$ ) for *fac*-[Re(CO)<sub>3</sub>(bpy)(nHo)]CF<sub>3</sub>SO<sub>3</sub>. The anisotropic displacement factor exponent takes the form:  $-2\pi^2 [h^2 a^{*2} U^{11} + \dots + 2 h k a^* b^* U^{12}]$ . To be deposited.

| Atom   | U11     | U22     | U33     | U23      | U13     | U12     |
|--------|---------|---------|---------|----------|---------|---------|
| C(1)   | 110(18) | 113(16) | 52(9)   | 10(9)    | -9(9)   | 68(15)  |
| C(2)   | 63(9)   | 88(12)  | 79(10)  | -21(9)   | -6(8)   | 33(9)   |
| C(3)   | 82(13)  | 114(16) | 85(14)  | 20(12)   | -7(10)  | 50(12)  |
| C(11)  | 82(12)  | 94(13)  | 61(10)  | 14(9)    | 1(8)    | 40(10)  |
| C(12)  | 87(14)  | 130(20) | 87(14)  | 19(14)   | 0(11)   | 38(14)  |
| C(13)  | 108(19) | 120(20) | 120(20) | 35(18)   | -4(15)  | 62(16)  |
| C(14)  | 96(16)  | 77(13)  | 150(30) | 30(15)   | 8(15)   | 32(12)  |
| C(15)  | 84(12)  | 72(11)  | 109(14) | 13(10)   | 8(11)   | 40(9)   |
| C(16)  | 75(11)  | 94(14)  | 58(9)   | -4(9)    | -2(8)   | 30(10)  |
| C(17)  | 99(16)  | 140(20) | 61(11)  | 15(13)   | 7(10)   | 44(15)  |
| C(18)  | 130(20) | 140(20) | 68(12)  | -16(13)  | 7(12)   | 63(18)  |
| C(19)  | 100(17) | 120(20) | 107(19) | -22(15)  | 17(13)  | 53(16)  |
| C(21)  | 70(10)  | 80(11)  | 77(10)  | 6(8)     | -2(8)   | 45(9)   |
| C(22)  | 90(12)  | 83(12)  | 64(9)   | 7(9)     | 7(9)    | 55(11)  |
| C(23)  | 74(10)  | 76(11)  | 49(7)   | 1(7)     | 4(7)    | 38(9)   |
| C(24)  | 95(13)  | 97(13)  | 46(7)   | -6(8)    | -3(8)   | 63(12)  |
| C(25)  | 85(13)  | 96(14)  | 73(11)  | 3(10)    | -13(10) | 41(12)  |
| C(26)  | 74(12)  | 117(19) | 77(12)  | -10(11)  | -3(9)   | 47(13)  |
| C(27)  | 105(18) | 99(17)  | 70(11)  | 2(11)    | 7(11)   | 43(14)  |
| C(28)  | 77(13)  | 113(17) | 63(10)  | 3(10)    | 2(9)    | 35(12)  |
| C(29)  | 69(10)  | 96(13)  | 48(7)   | 6(8)     | 1(7)    | 41(9)   |
| C(110) | 78(12)  | 96(14)  | 87(12)  | 2(11)    | 11(10)  | 37(10)  |
| C(210) | 70(9)   | 81(11)  | 47(7)   | 0(7)     | -3(6)   | 39(8)   |
| C(211) | 75(10)  | 88(12)  | 56(8)   | 1(8)     | 0(8)    | 43(10)  |
| N(11)  | 80(9)   | 76(9)   | 83(10)  | 7(8)     | -11(8)  | 28(8)   |
| N(12)  | 73(8)   | 94(11)  | 53(7)   | 5(7)     | 6(6)    | 33(8)   |
| N(21)  | 73(9)   | 74(9)   | 62(8)   | 10(6)    | 9(6)    | 30(7)   |
| N(22)  | 77(9)   | 74(9)   | 64(8)   | -4(7)    | -2(7)   | 36(8)   |
| O(1)   | 63(8)   | 134(13) | 97(10)  | 1(9)     | 0(7)    | 39(8)   |
| O(2)   | 108(10) | 105(10) | 92(9)   | 29(8)    | 0(8)    | 64(9)   |
| O(3)   | 125(12) | 141(14) | 73(9)   | -30(9)   | 1(8)    | 70(11)  |
| O(4)   | 124(15) | 101(13) | 210(30) | 53(15)   | 26(17)  | 35(12)  |
| O(5)   | 99(12)  | 124(15) | 210(20) | -22(15)  | -36(13) | 66(12)  |
| O(6)   | 180(20) | 220(30) | 132(17) | 30(17)   | -17(16) | 120(20) |
| F(1)   | 87(10)  | 179(18) | 270(30) | -36(18)  | 13(13)  | 74(11)  |
| F(2)   | 210(30) | 480(70) | 170(20) | -120(40) | -60(20) | 170(40) |
| F(3)   | 117(15) | 105(14) | 500(70) | -70(20)  | 10(30)  | 24(12)  |
| S(1)   | 92(4)   | 95(4)   | 140(5)  | 12(4)    | 6(4)    | 50(3)   |
| Re     | 70(1)   | 76(1)   | 58(1)   | 5(1)     | -1(1)   | 35(1)   |

**Table S9a.** Hydrogen coordinates ( $\times 10^4$ ) and isotropic displacement parameters ( $\text{\AA}^2 \times 10^3$ ) for *fac*-[Re(CO)<sub>3</sub>(phen)(nHo)]CF<sub>3</sub>SO<sub>3</sub>. To be deposited.

| Atom   | x    | y     | z    | U(eq) |
|--------|------|-------|------|-------|
| H(10)  | 237  | 4217  | 3822 | 67    |
| H(13)  | 1845 | 882   | 368  | 53    |
| H(14)  | 3789 | 1064  | 406  | 60    |
| H(15)  | 4720 | 2029  | 1329 | 57    |
| H(18)  | -870 | 3339  | 2925 | 65    |
| H(21)  | 4541 | 1042  | 2771 | 55    |
| H(22)  | 4353 | -316  | 3494 | 57    |
| H(25)  | 3825 | -1678 | 4711 | 69    |
| H(26)  | 3217 | -2352 | 5814 | 82    |
| H(27)  | 2528 | -1406 | 6746 | 82    |
| H(28)  | 2327 | 249   | 6601 | 71    |
| H(110) | 2184 | 4248  | 3772 | 59    |
| H(111) | -943 | 2241  | 1758 | 57    |
| H(112) | -21  | 1391  | 894  | 56    |
| H(211) | 3325 | 2689  | 4334 | 48    |
| H(22A) | 2770 | 1719  | 5590 | 56    |

**Table S9b.** Hydrogen coordinates ( $\times 10^4$ ) and isotropic displacement parameters ( $\text{\AA}^2 \times 10^3$ ) for *fac*-[Re(CO)<sub>3</sub>(bpy)(nHo)]CF<sub>3</sub>SO<sub>3</sub>. To be deposited.

| Atom   | x     | y     | z    | U(eq) |
|--------|-------|-------|------|-------|
| H(12)  | 4107  | 3698  | 2691 | 128   |
| H(13)  | 4136  | 5182  | 3270 | 137   |
| H(14)  | 4195  | 5611  | 5419 | 134   |
| H(15)  | 4336  | 4622  | 7087 | 105   |
| H(17)  | 4260  | 2344  | 2265 | 130   |
| H(18)  | 4126  | 751   | 2037 | 135   |
| H(19)  | 4105  | -160  | 3955 | 130   |
| H(21)  | 2504  | 2934  | 7340 | 87    |
| H(22)  | 779   | 2135  | 7333 | 88    |
| H(25)  | -1424 | 581   | 7150 | 104   |
| H(26)  | -2878 | -903  | 7220 | 108   |
| H(27)  | -2986 | -2524 | 7129 | 114   |
| H(28)  | -1448 | -2563 | 7209 | 108   |
| H(110) | 4240  | 570   | 6011 | 108   |
| H(211) | 2511  | 352   | 7110 | 86    |
| H(22A) | 605   | -1313 | 7143 | 87    |
